# Supplementary material for: Structural evolution from TiO2nanoparticles to nanosheets and their photocatalytic performance in hydrogen generation and environmental pollution removal
Source: Royal Society of Chemistry journal article supplement (doi:10.1039/c3ra48066f), 2014-04-02
Supplement: c3ra48066f1.pdf [file c3ra48066f1.pdf]

## Supporting information

### Structural Evolution from TiO<sub>2</sub> Nanoparticles to Nanosheets and Their Photocatalytic Performance in Hydrogen Generation and Environmental Pollution Removal

Yuliang Zhang,<sup>a,b</sup> Ting Xia,<sup>a</sup> Mingwei Shang,<sup>c,d</sup> Petra Wallenmeyer,<sup>a</sup> Dakota Katelyn,<sup>a</sup> Appie Peterson,<sup>a</sup> James Murowchick,<sup>e</sup> Lifeng Dong,<sup>c,d</sup> Xiaobo Chen<sup>a,\*</sup>

<sup>a</sup> Department of Chemistry, University of Missouri – Kansas City, Kansas City, MO 64110, USA.

<sup>b</sup> Institute of Materials Science and Engineering, Shanghai Maritime University, Shanghai, 201306, P. R. China.

<sup>c</sup> Department of Physics, Astronomy, and Materials Science, Missouri State University, Springfield, Missouri 65897, USA.

<sup>d</sup> College of Materials Science and Engineering, Qingdao University of Science and Technology, Qingdao 266042, People's Republic of China.

<sup>e</sup> Department of Geosciences, University of Missouri – Kansas City, Kansas City, MO 64110, USA.

Additional TEM images of the TiO<sub>2</sub> samples prepared in this study.

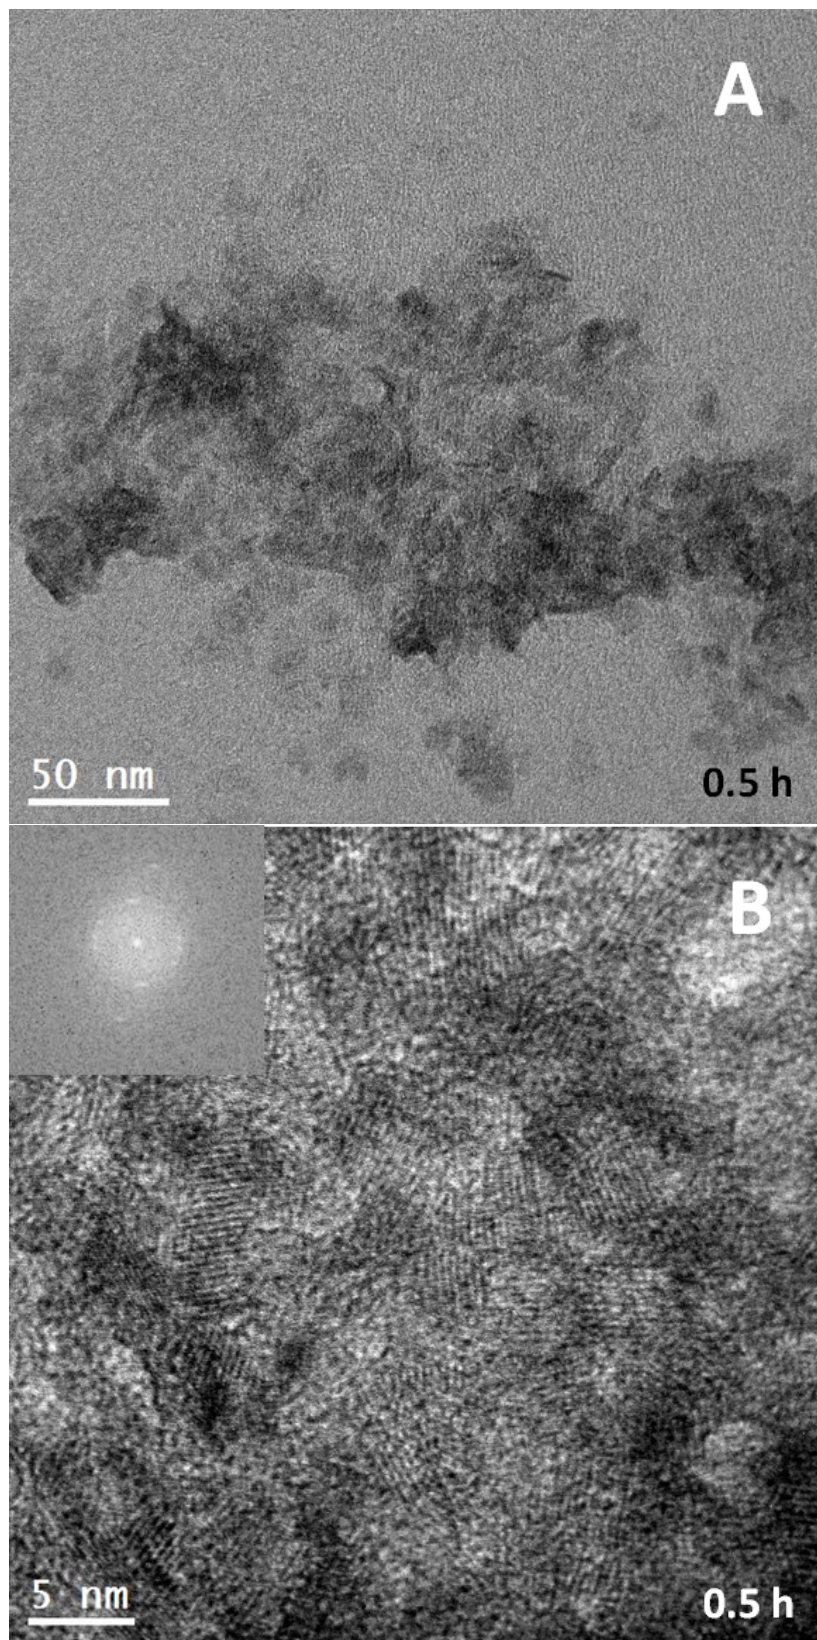

**Fig. S1** TEM images of the TiO<sub>2</sub> samples synthesized after 0.5 h. The inset shows the FFT of the TEM image.

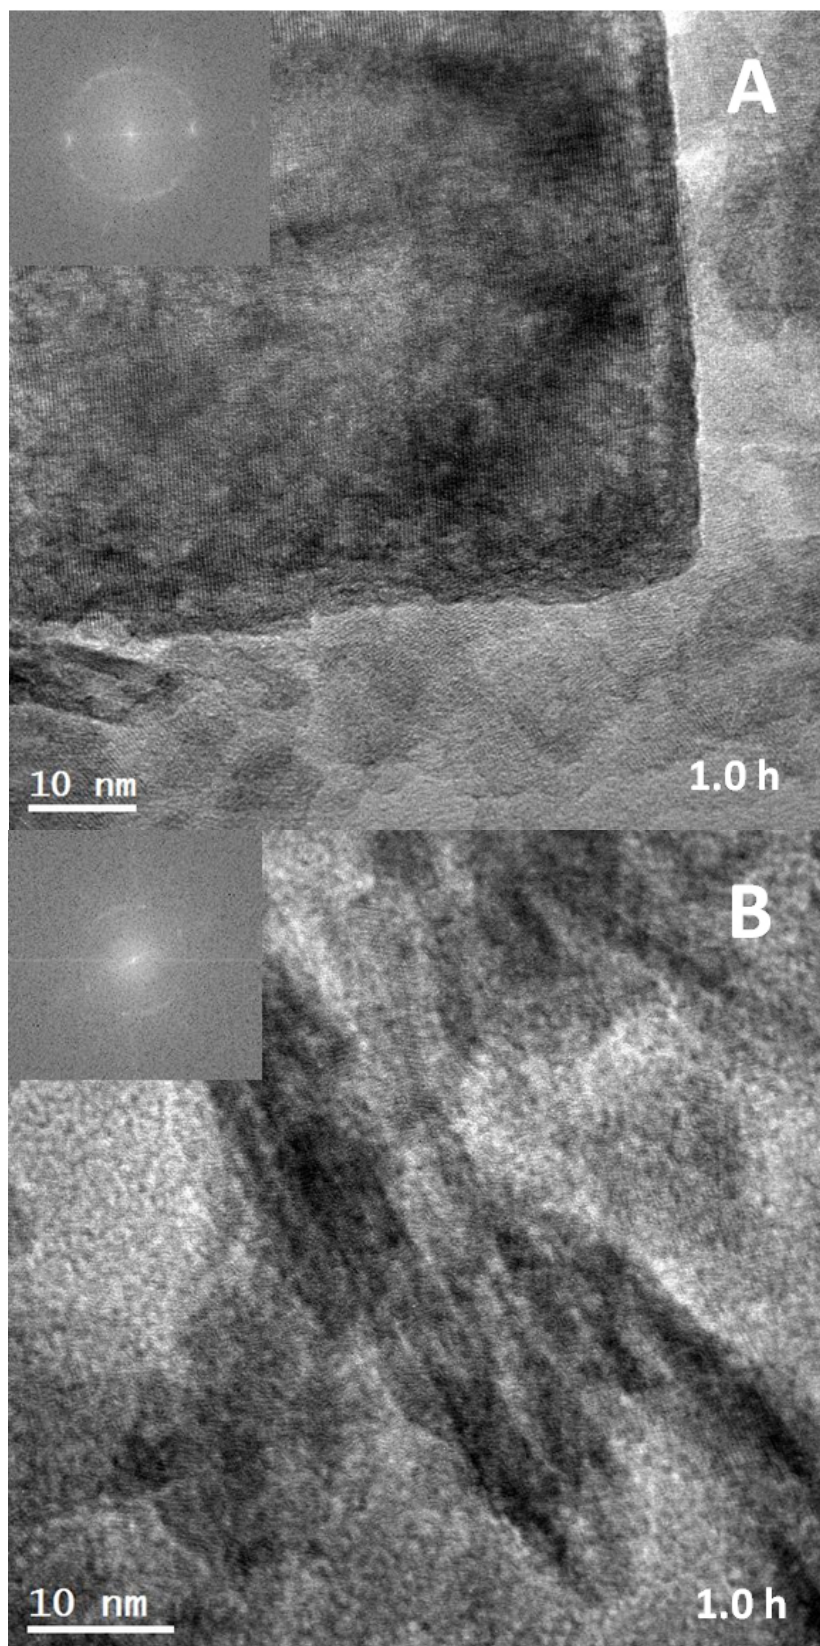

**Fig. S2** TEM images of the TiO<sub>2</sub> samples synthesized after 1.0 h. The insets show the FFT of the TEM image.



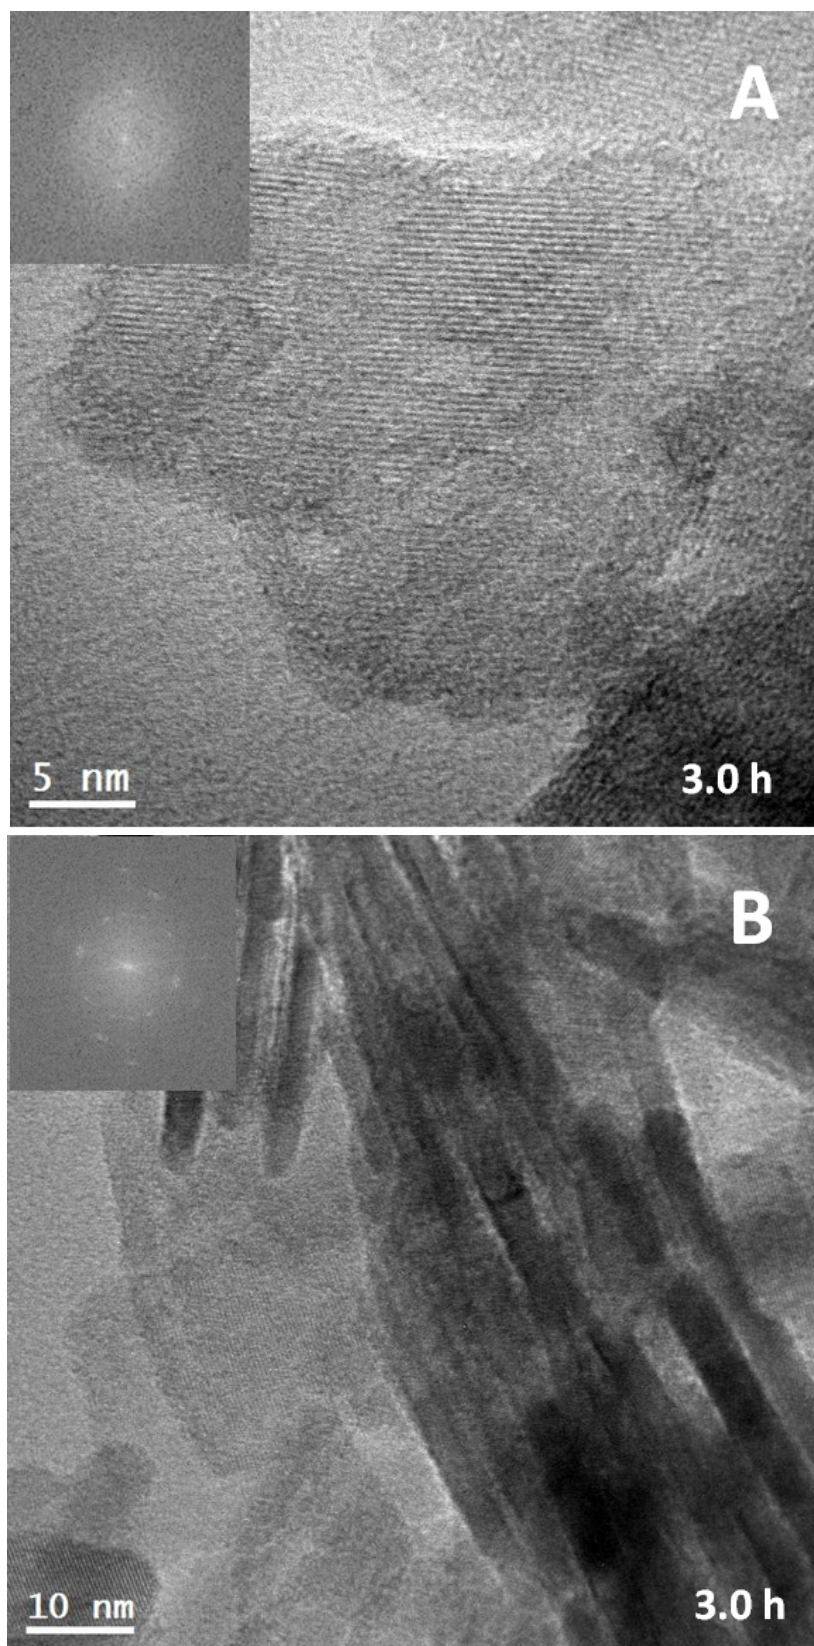

**Fig. S3** TEM images of the TiO<sub>2</sub> samples synthesized after 3.0 h. The insets show the FFT of the TEM image.

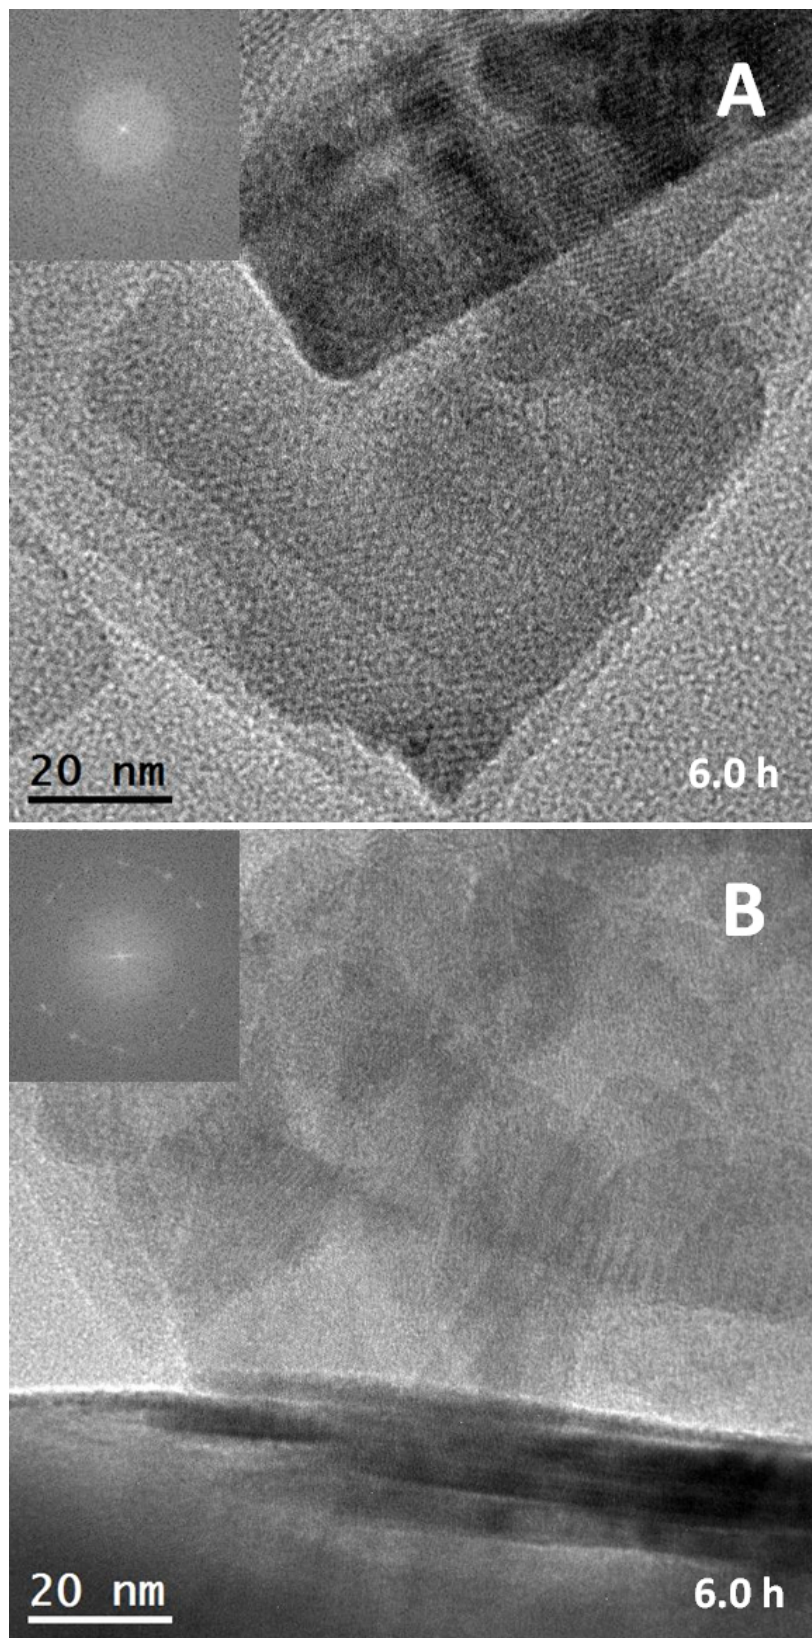

**Fig. S4** TEM images of the TiO<sub>2</sub> samples synthesized after 6.0 h. The insets show the FFT of the TEM image.



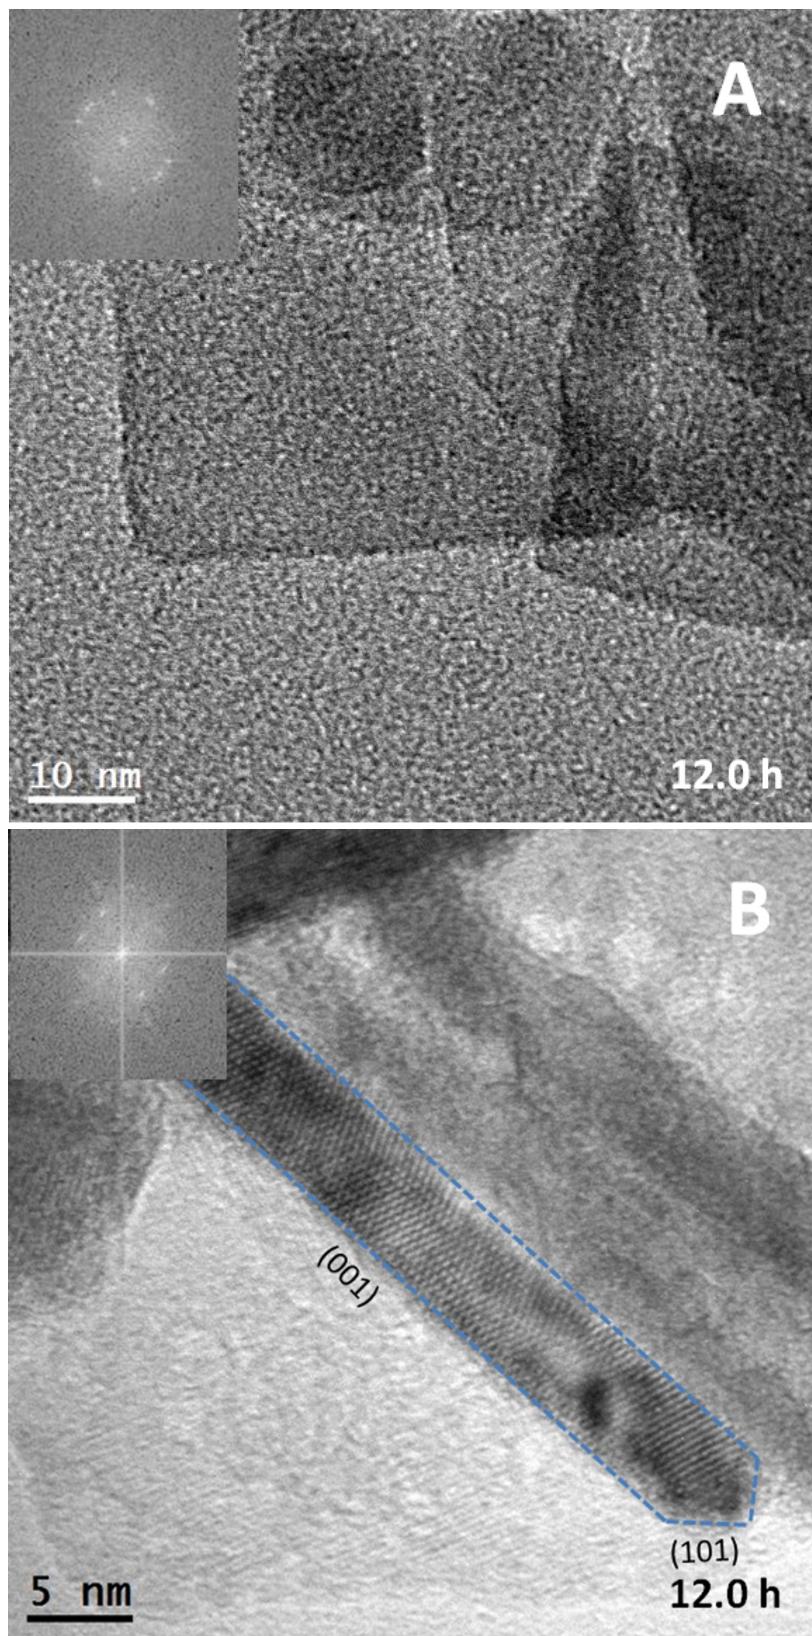

**Fig. S5** TEM images of the TiO<sub>2</sub> samples synthesized after 12.0 h. The insets show the FFT of the TEM image.

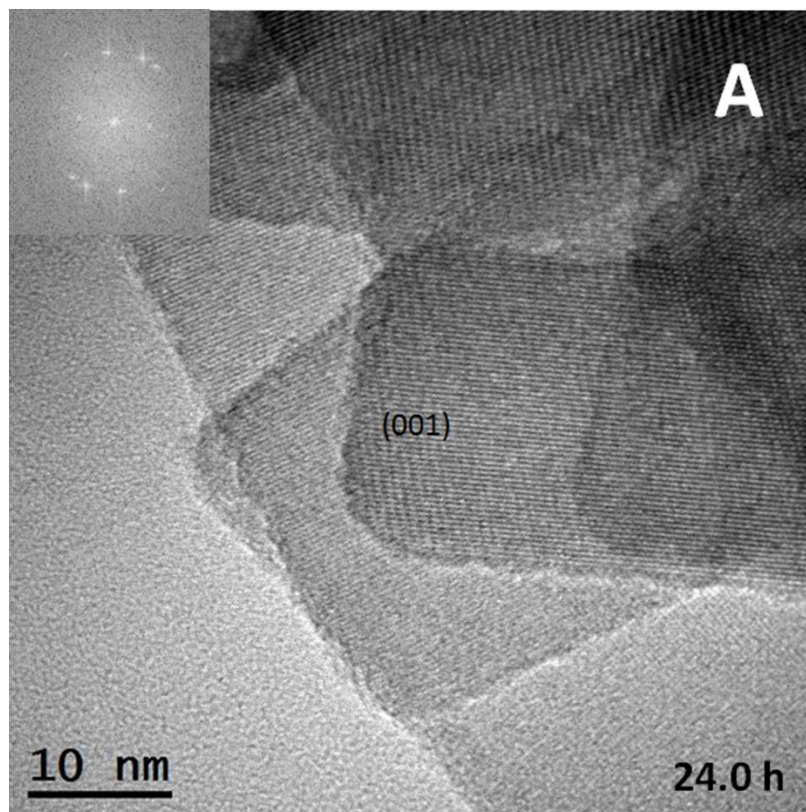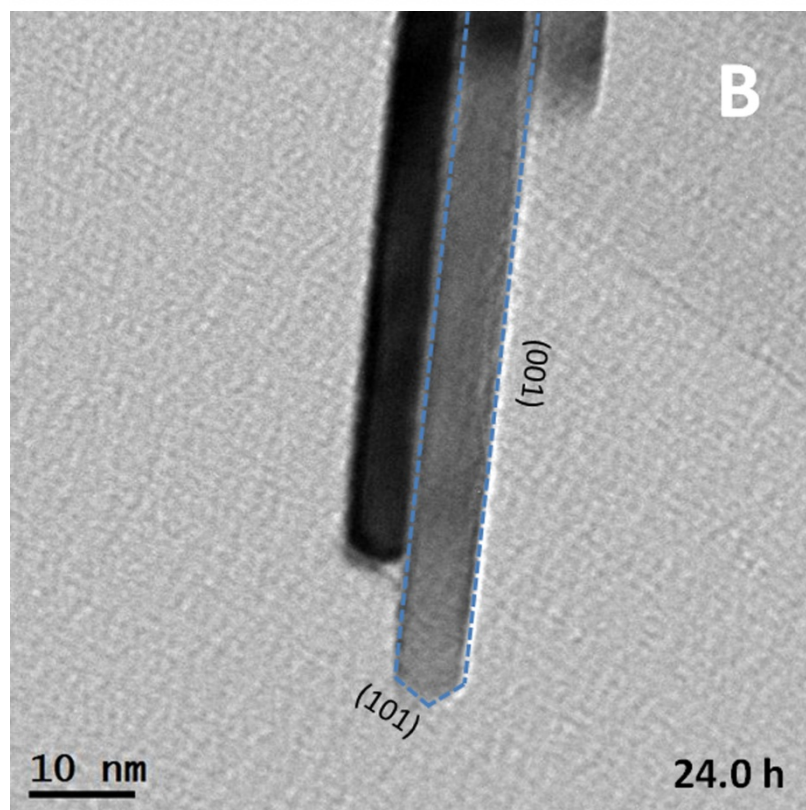

**Fig. S6** TEM images of the TiO<sub>2</sub> samples synthesized after 24.0 h. The inset shows the FFT of the TEM image.
